# Supplementary material for: Synthesis and immunostimulatory activity of diethanolamine-containing lipid A mimics
Source: Royal Society of Chemistry journal article supplement (doi:10.1039/c2ra01149b), 2012-01-01

## SUPPORTING INFORMATION

### **Synthesis and immunological activity of diethanolamine-containing lipid A mimics**

Jordan D. Lewicky<sup>a</sup>, Marina Ulanova<sup>b</sup> and Zi-Hua Jiang<sup>a\*</sup>

<sup>a</sup> Department of Chemistry, Lakehead University, 955 Oliver Road, Thunder Bay,  
Ontario, P7B 5E1, Canada

<sup>b</sup> Medical Sciences Division, Northern Ontario School of Medicine, Lakehead University,  
955 Oliver Road, Thunder Bay, ON P7B 5E1, Canada.

Footnote:

\* Corresponding author. Tel: +1 807 766 7171; fax: +1 807 346 7775; email:

[zjiang@lakeheadu.ca](mailto:zjiang@lakeheadu.ca)

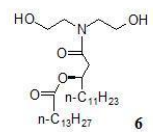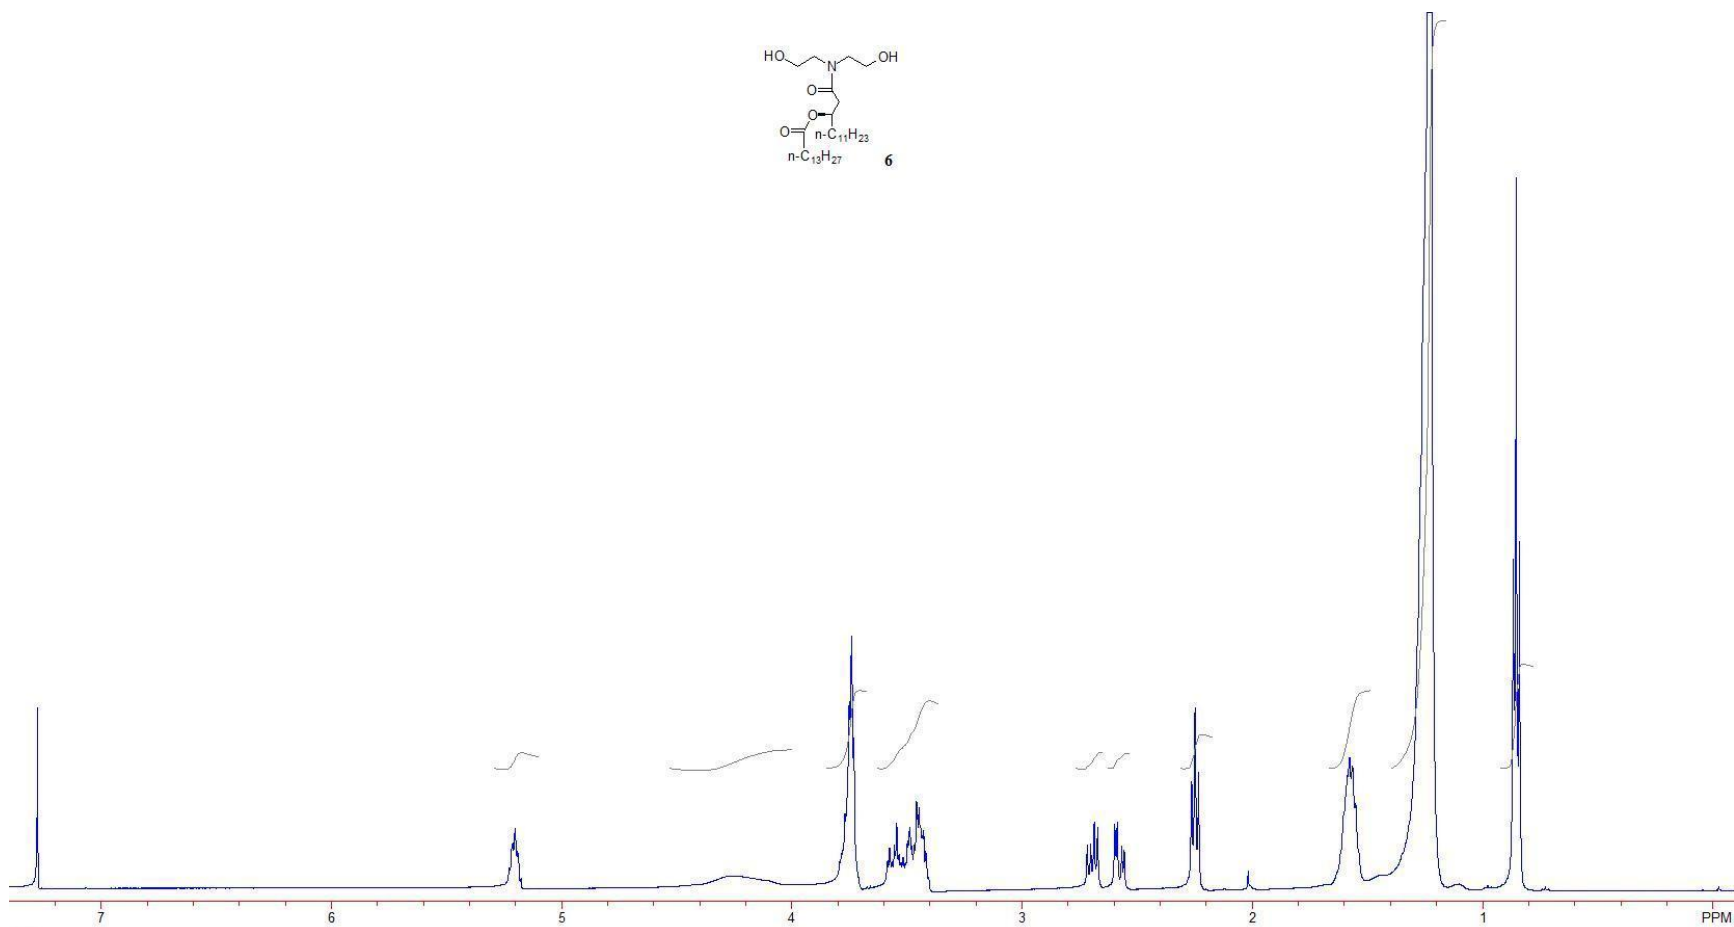

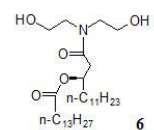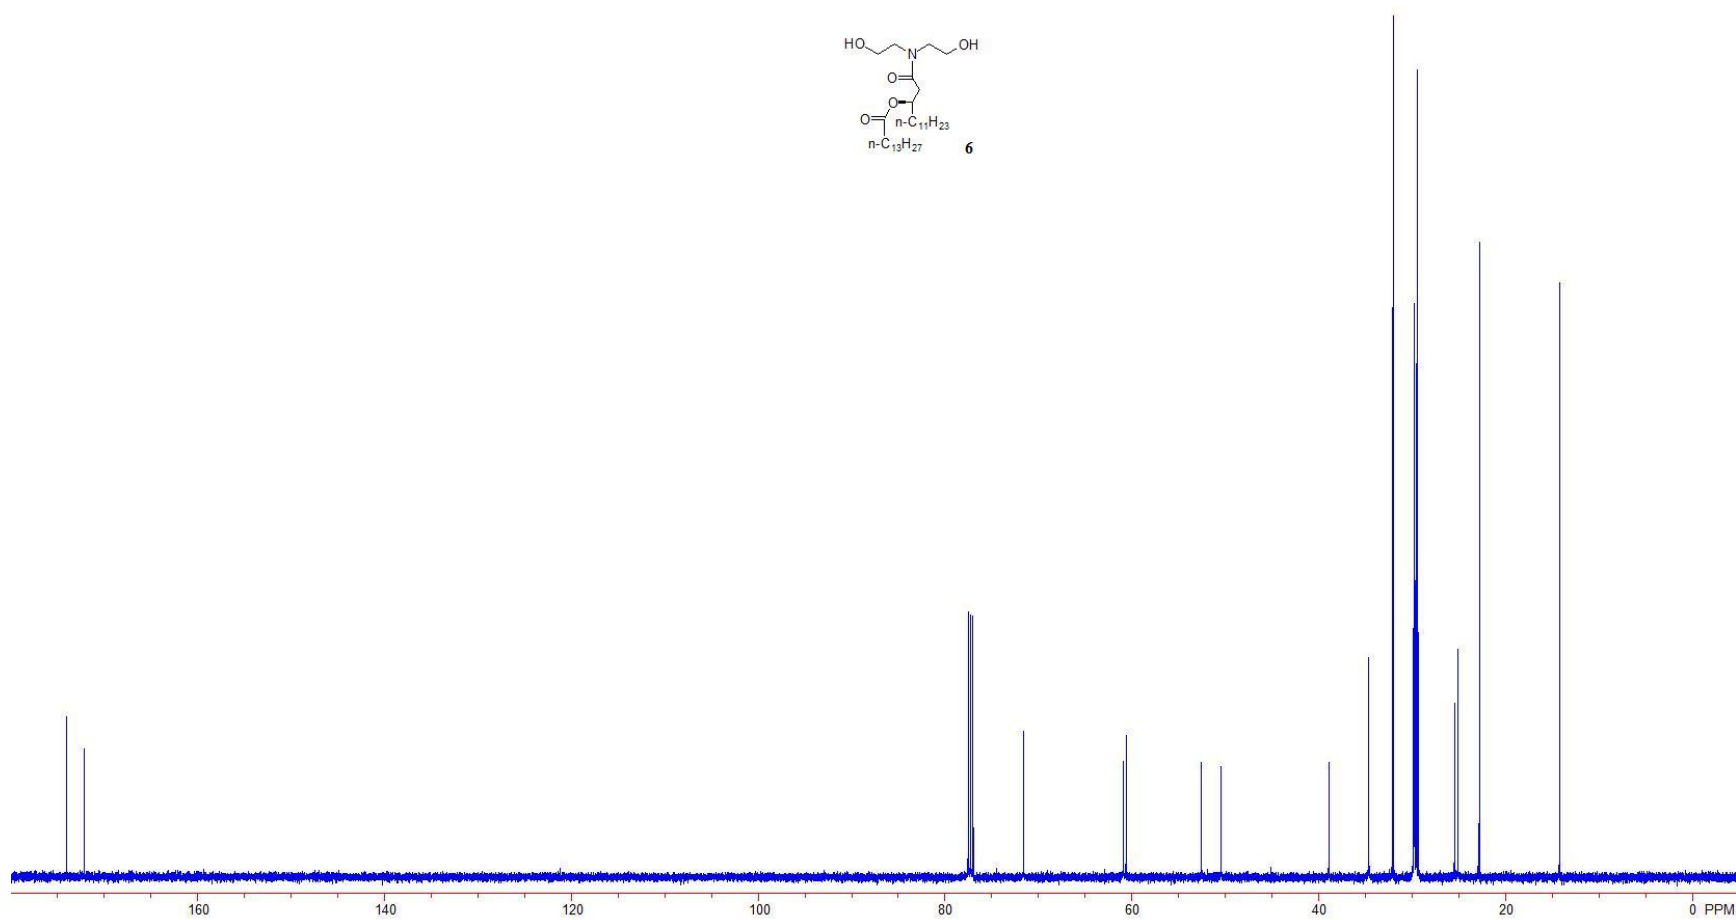

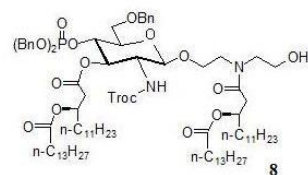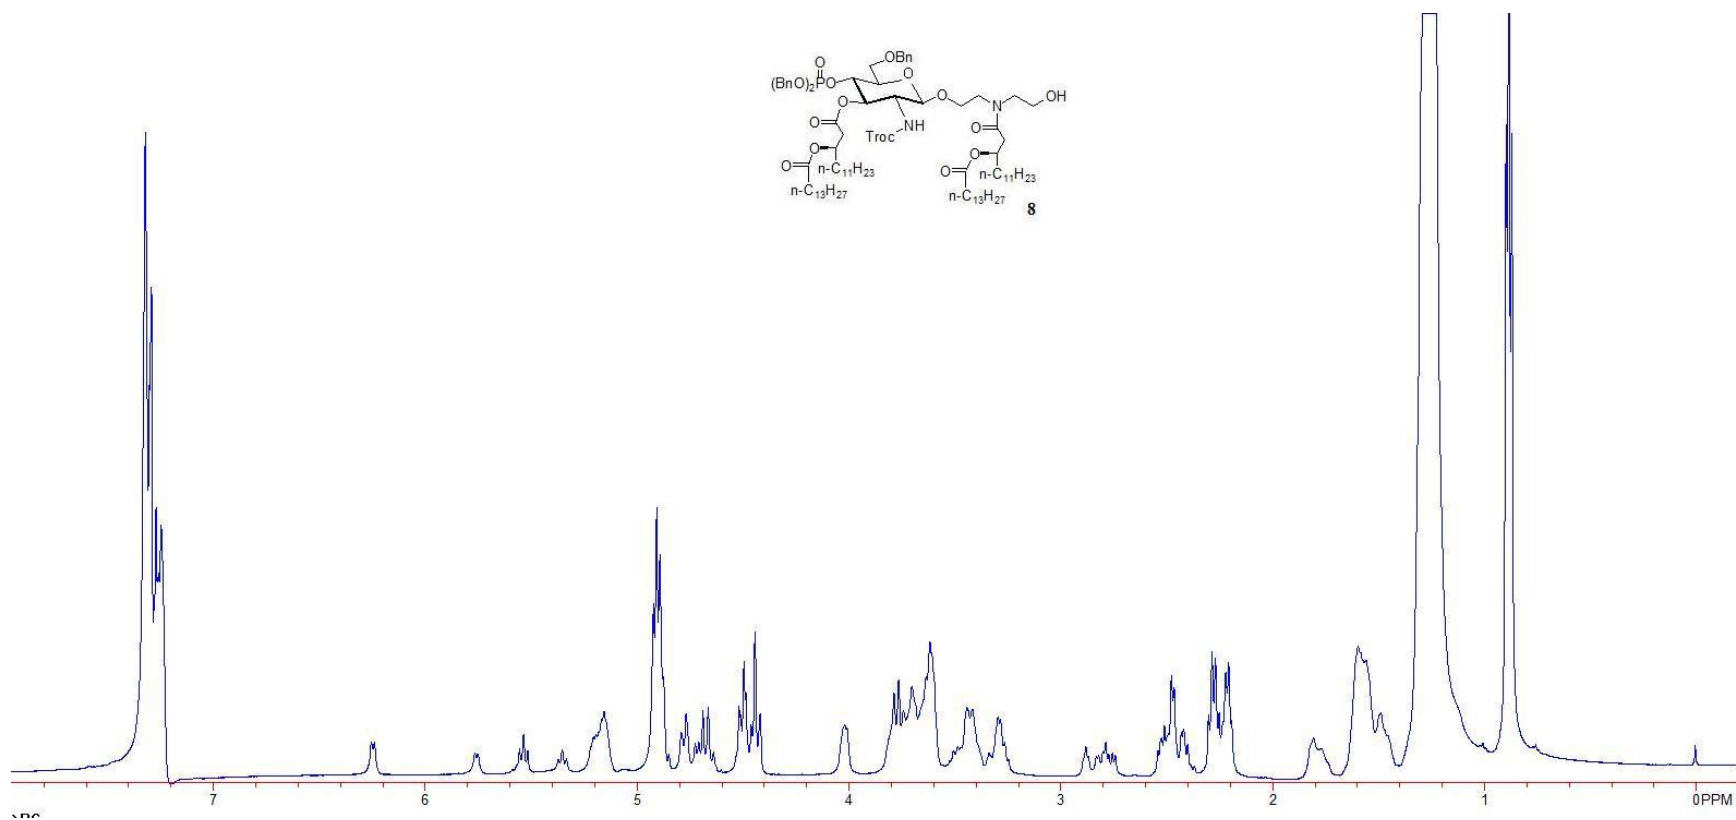

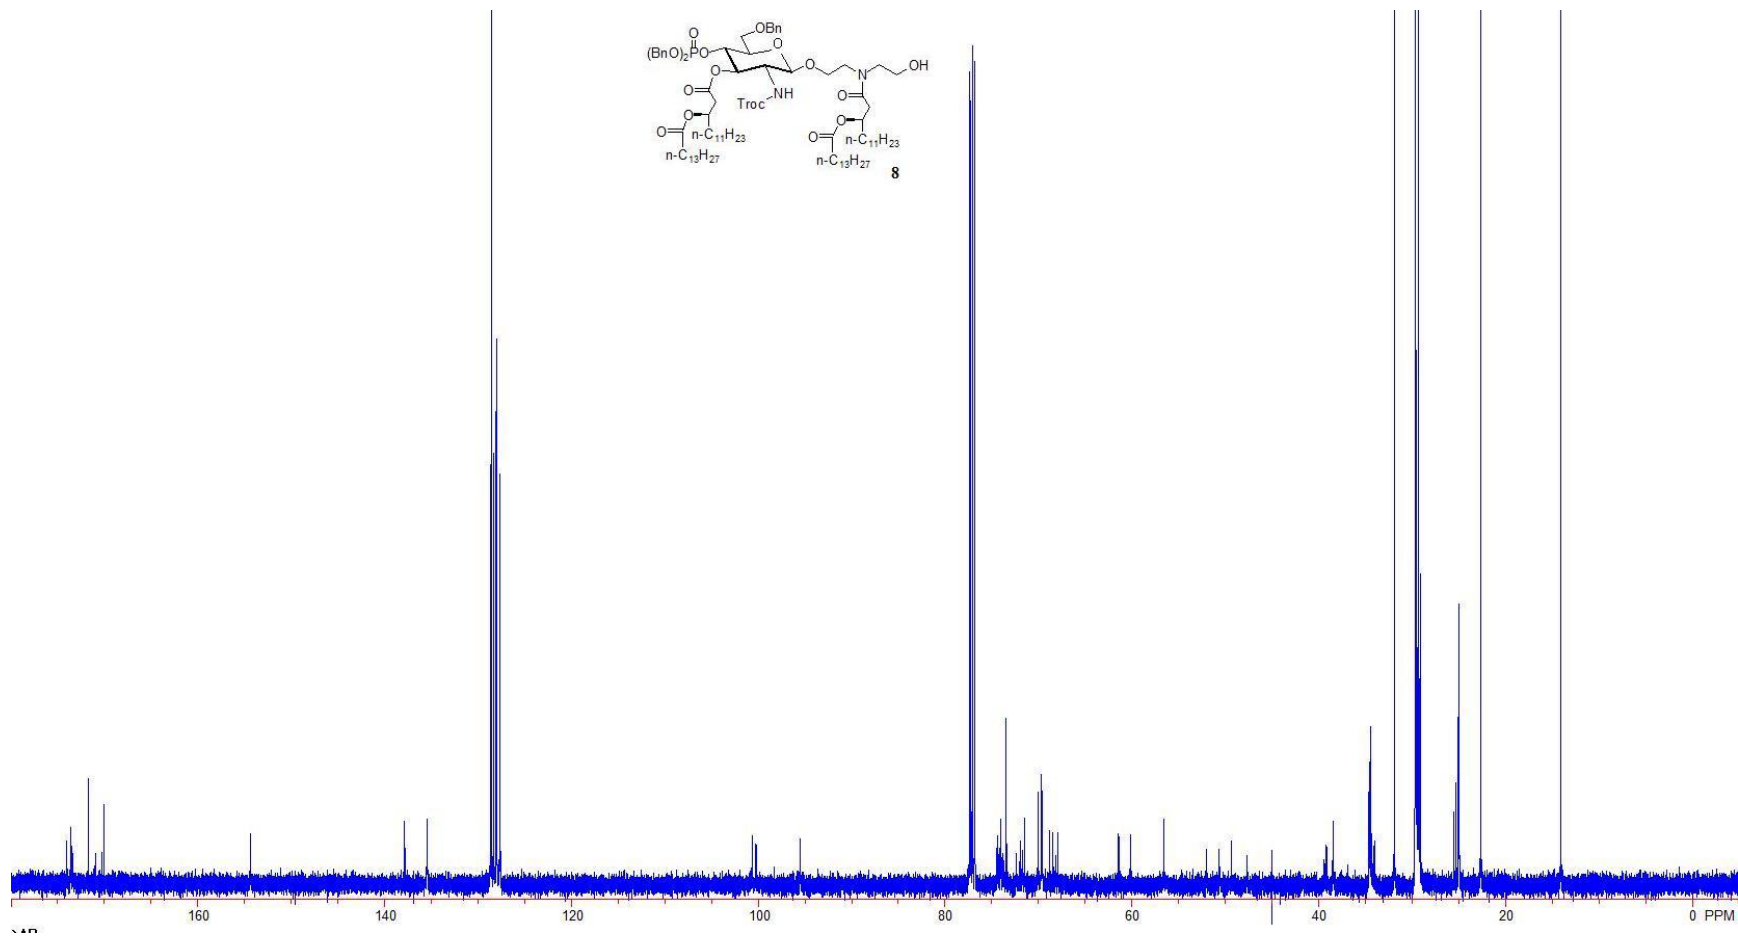

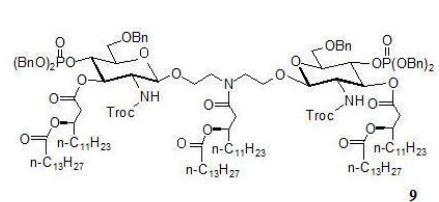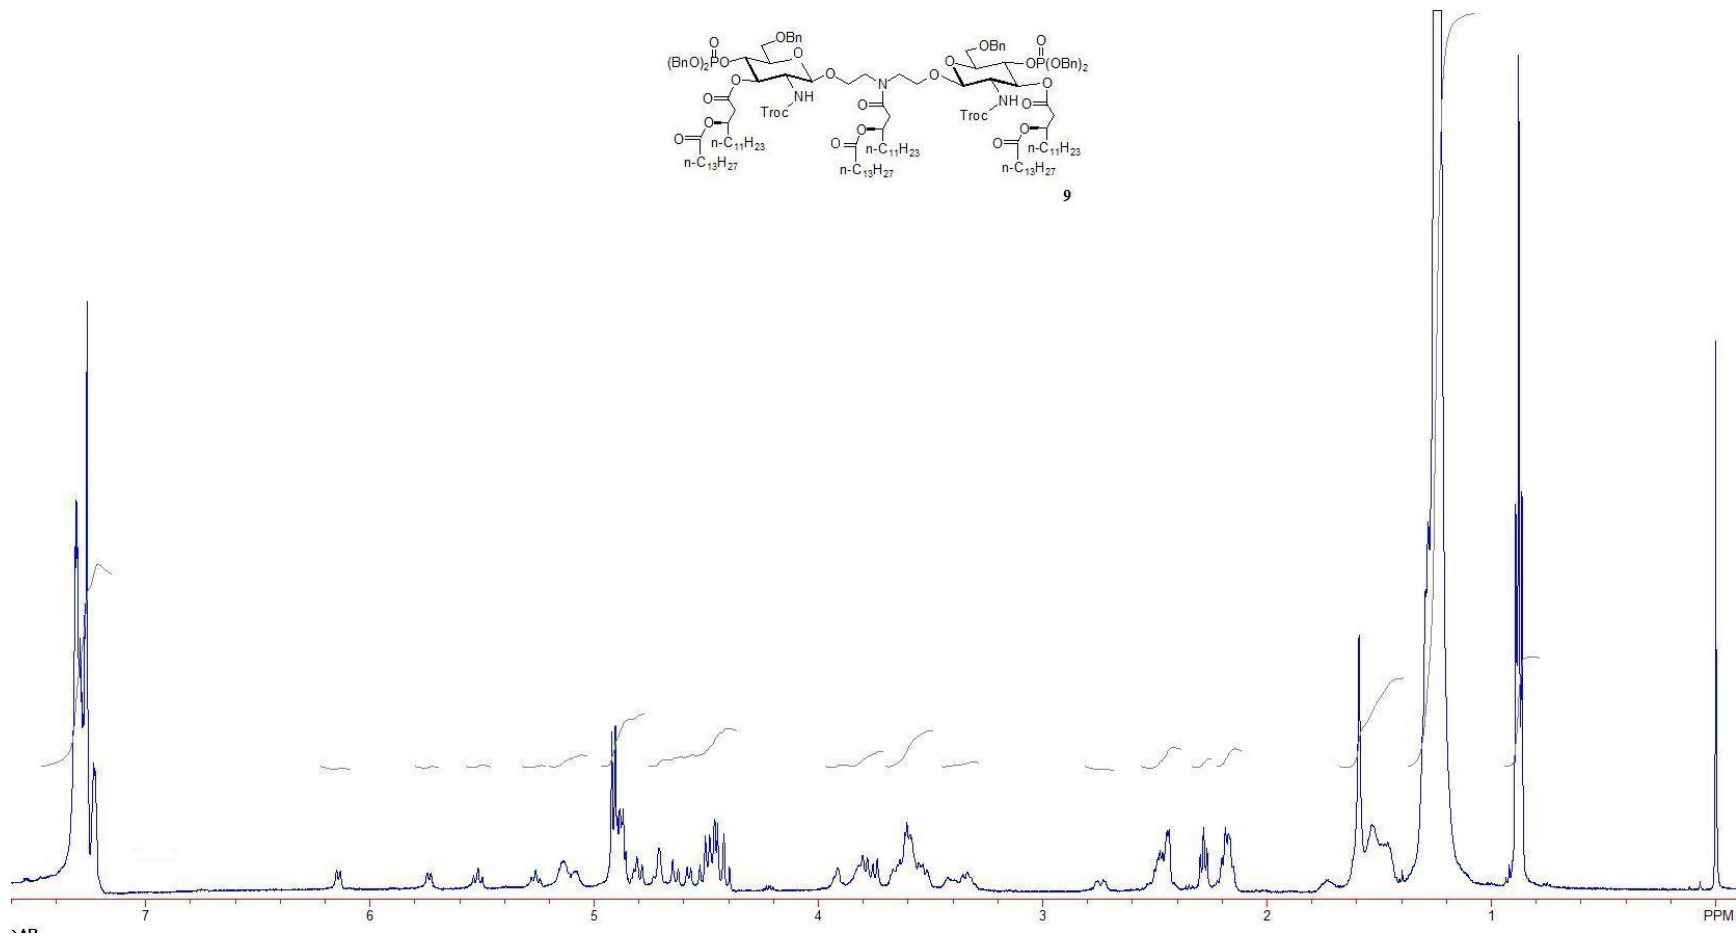

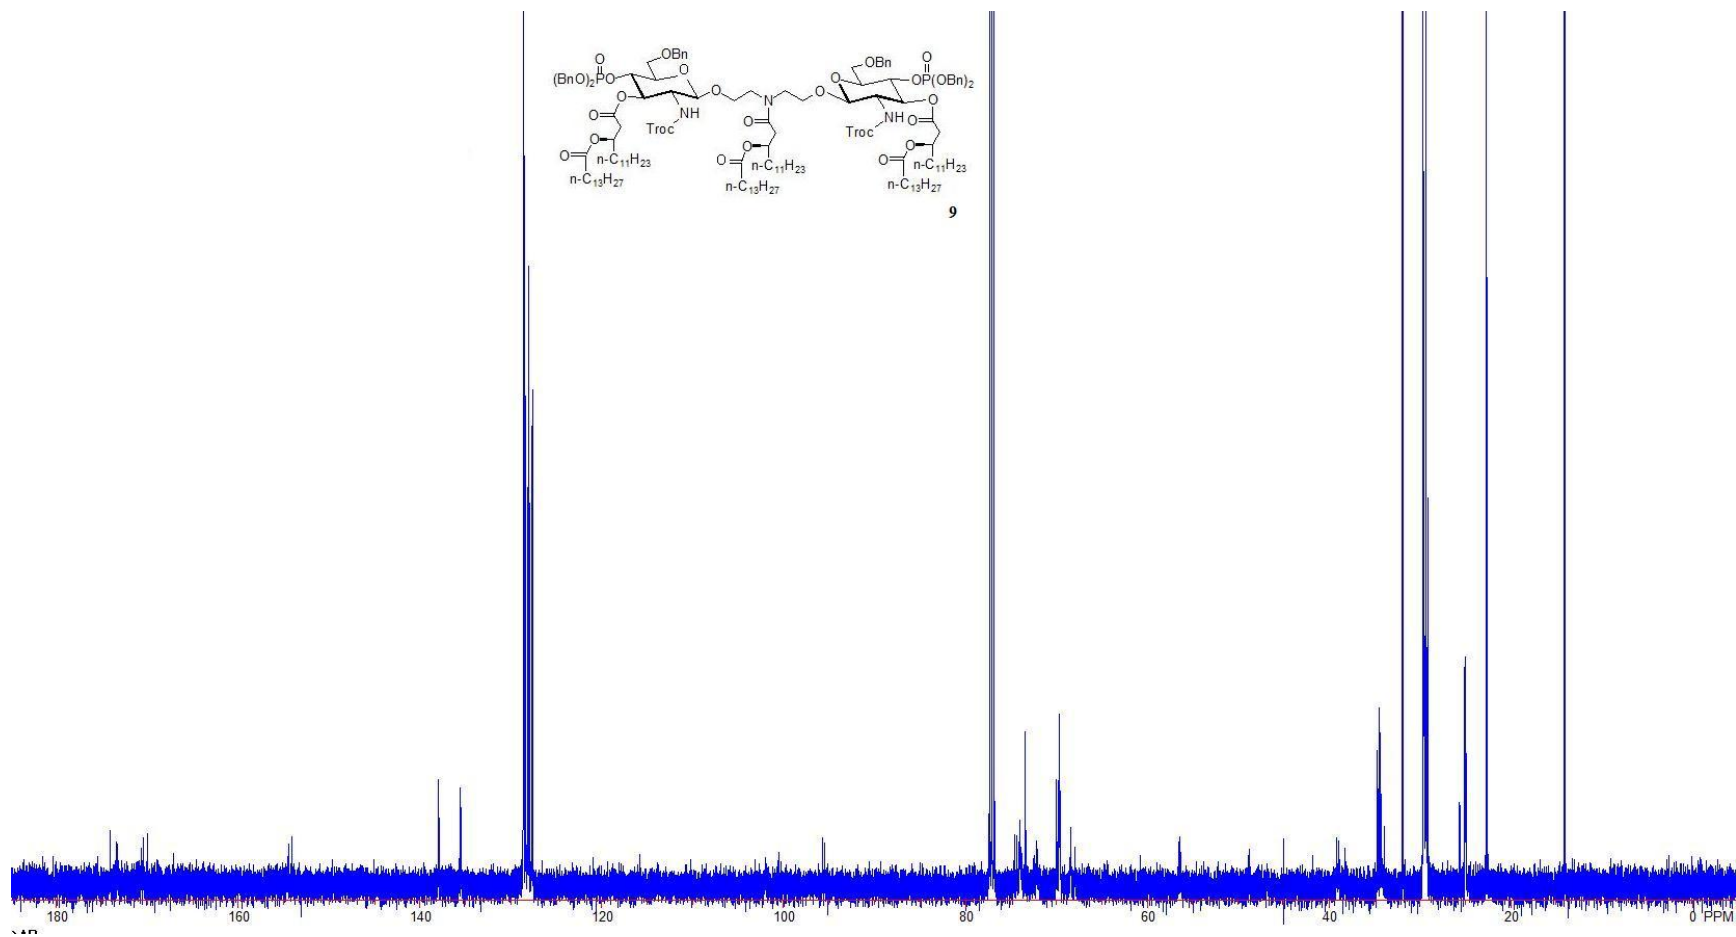

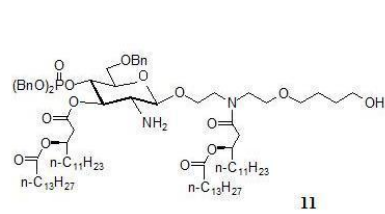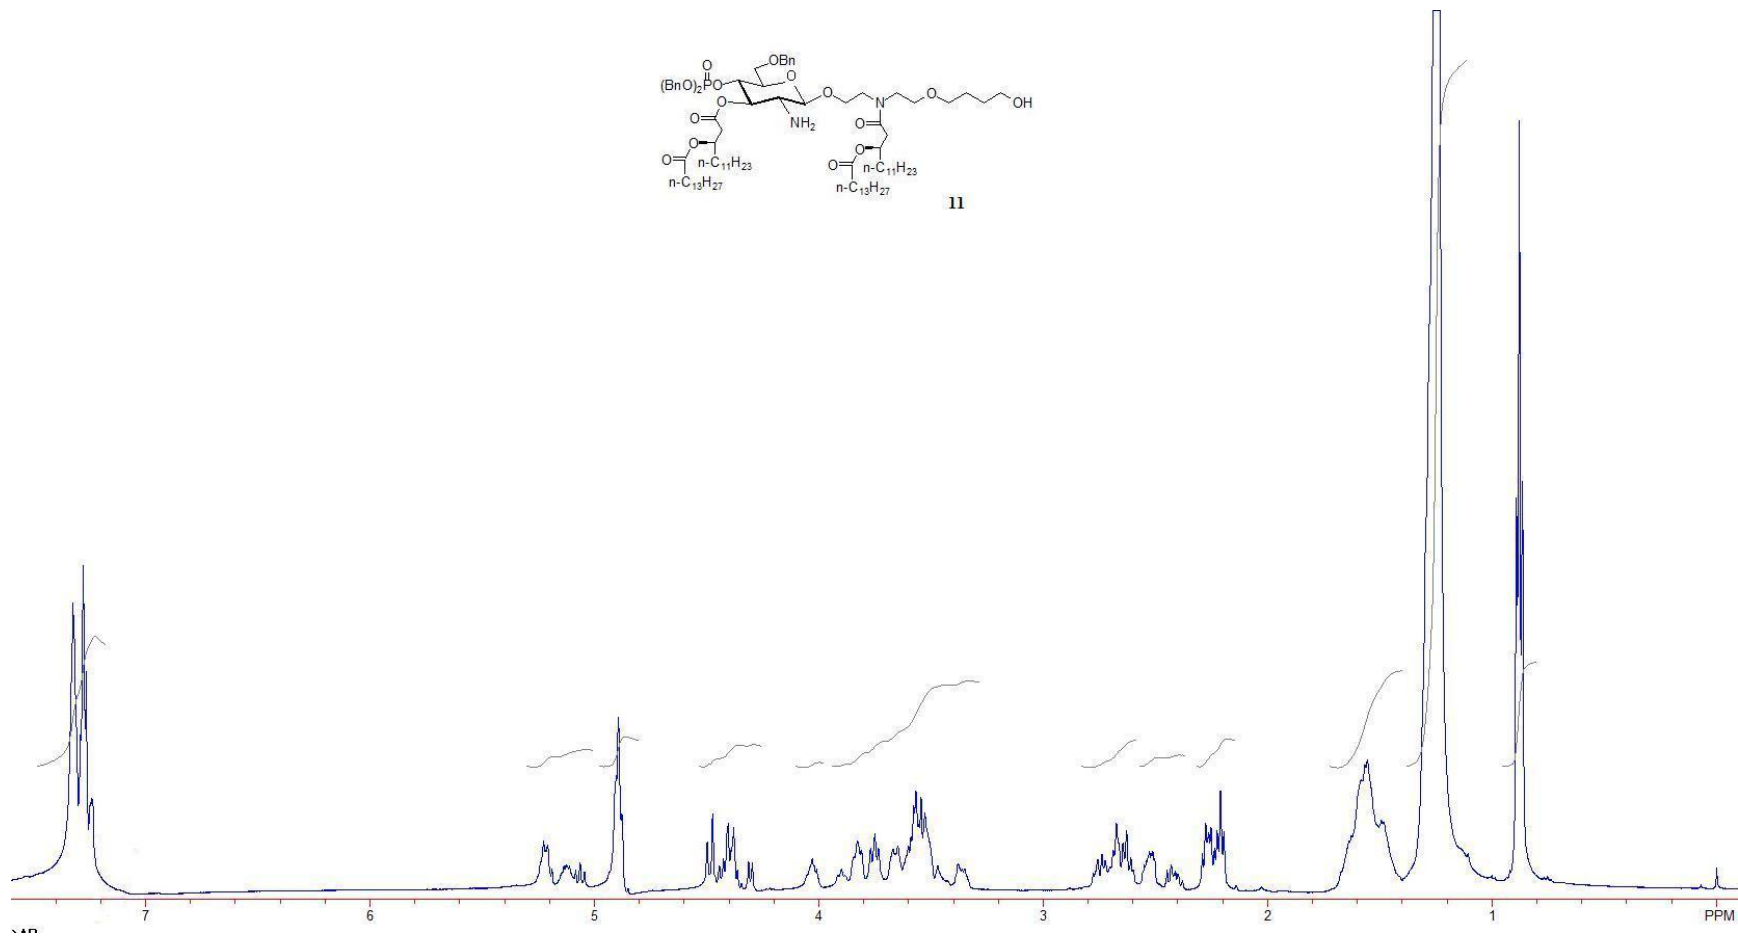



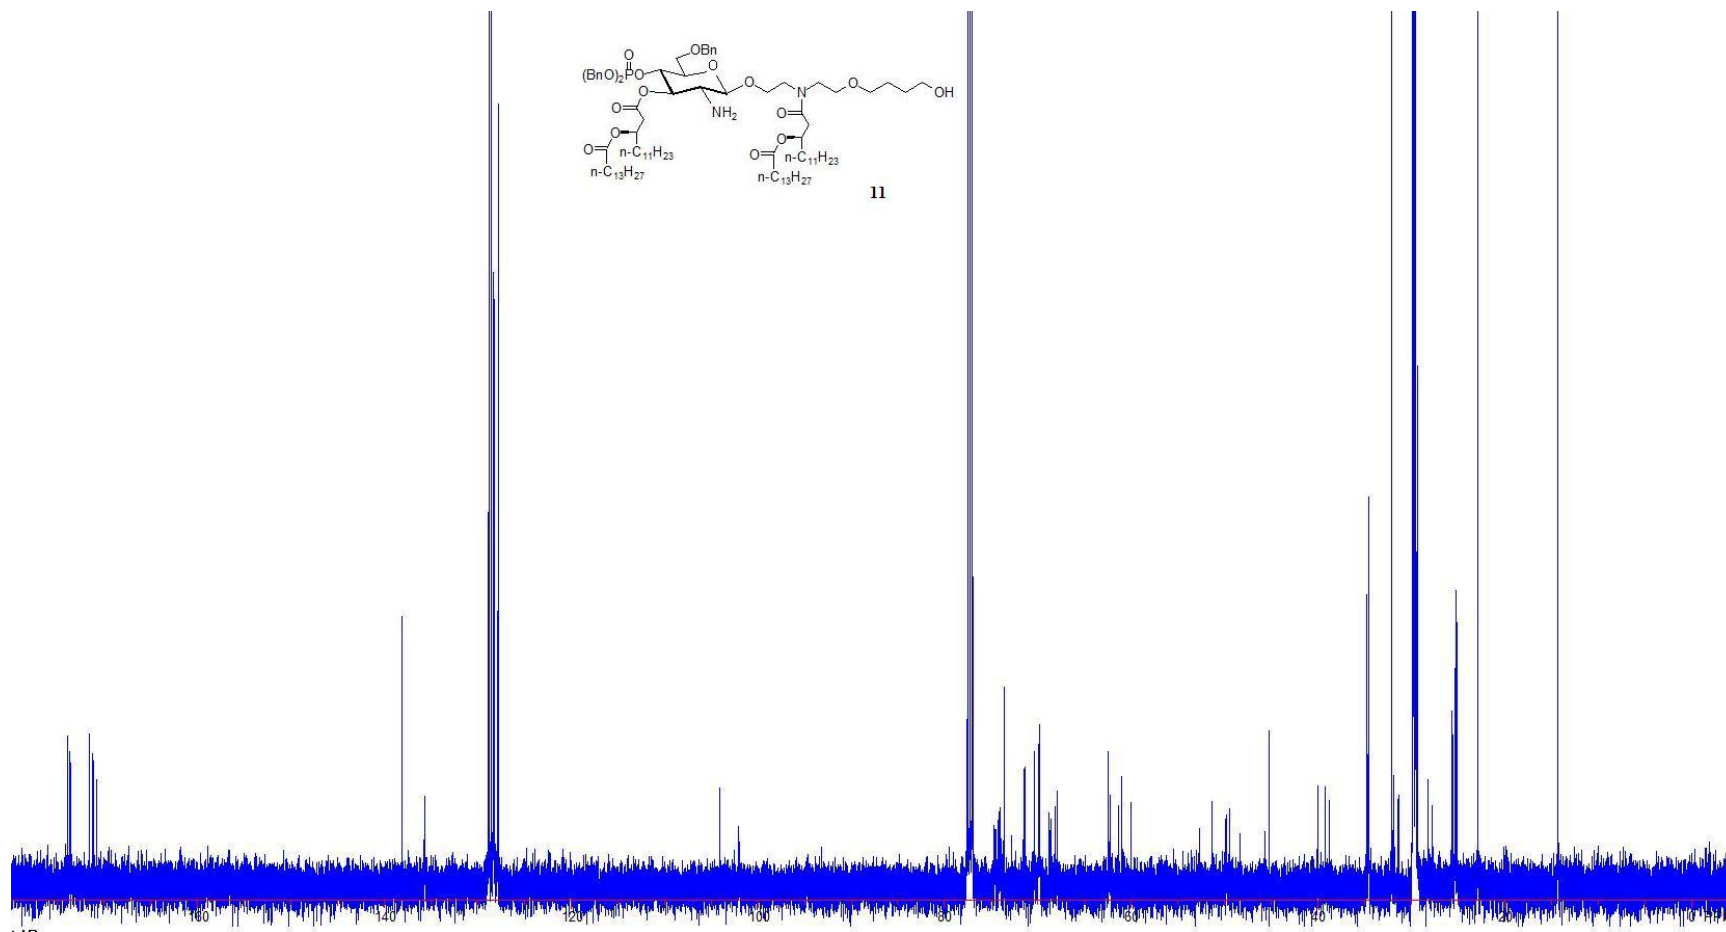

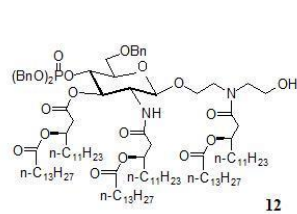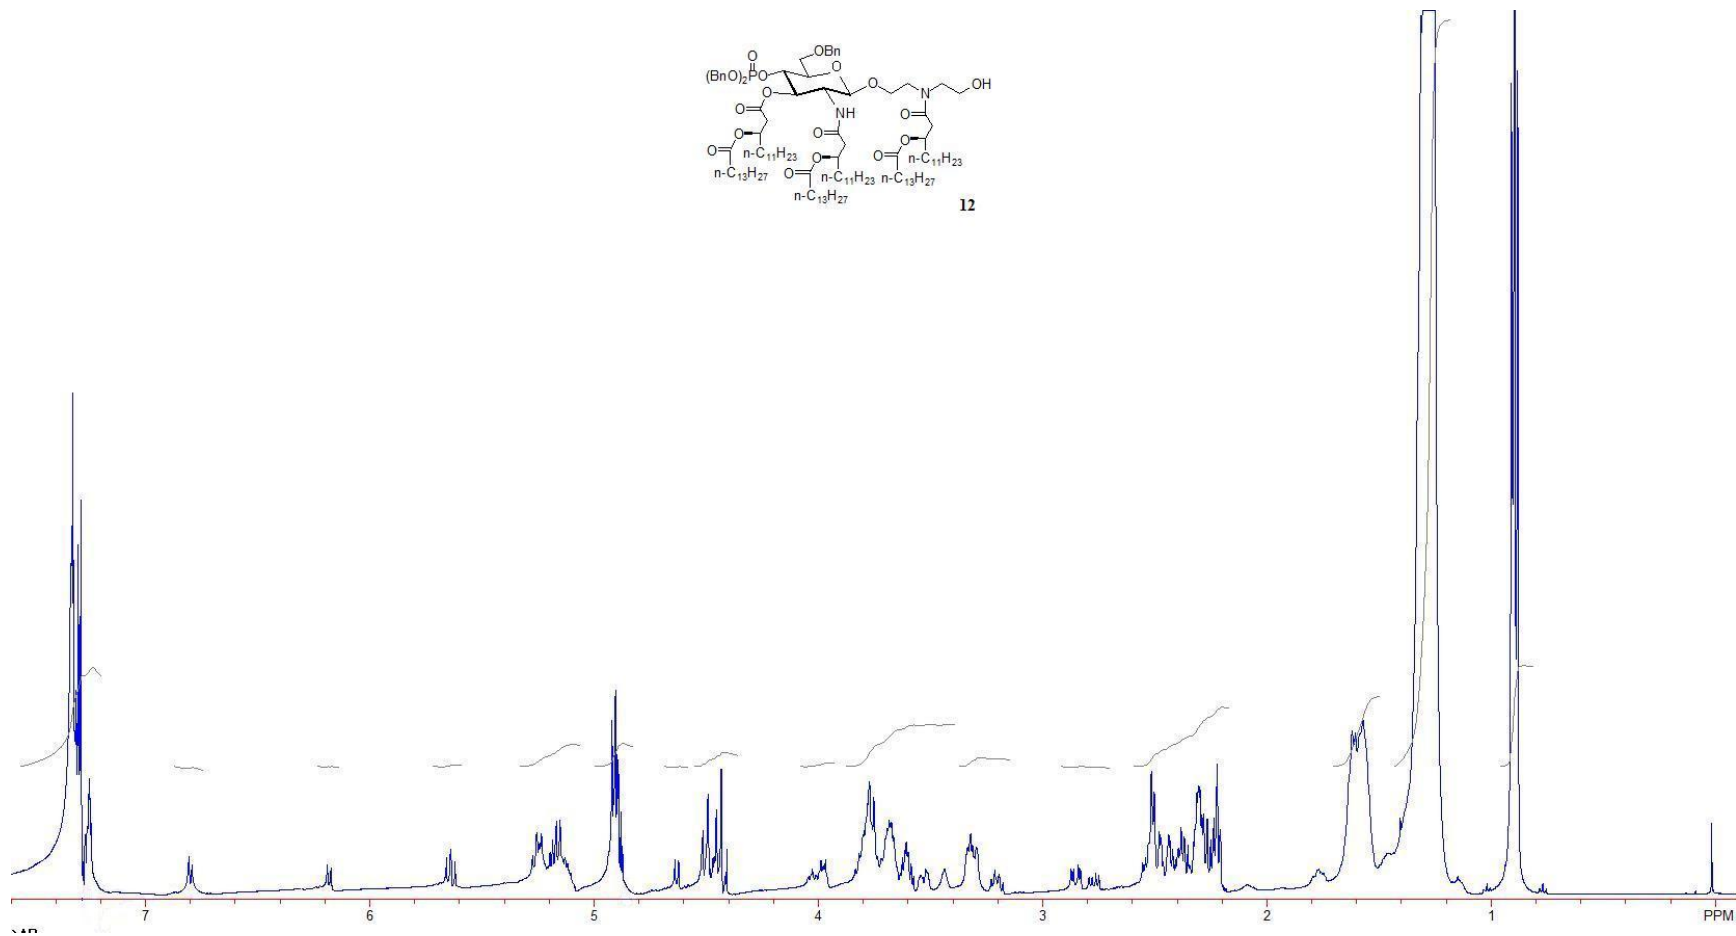

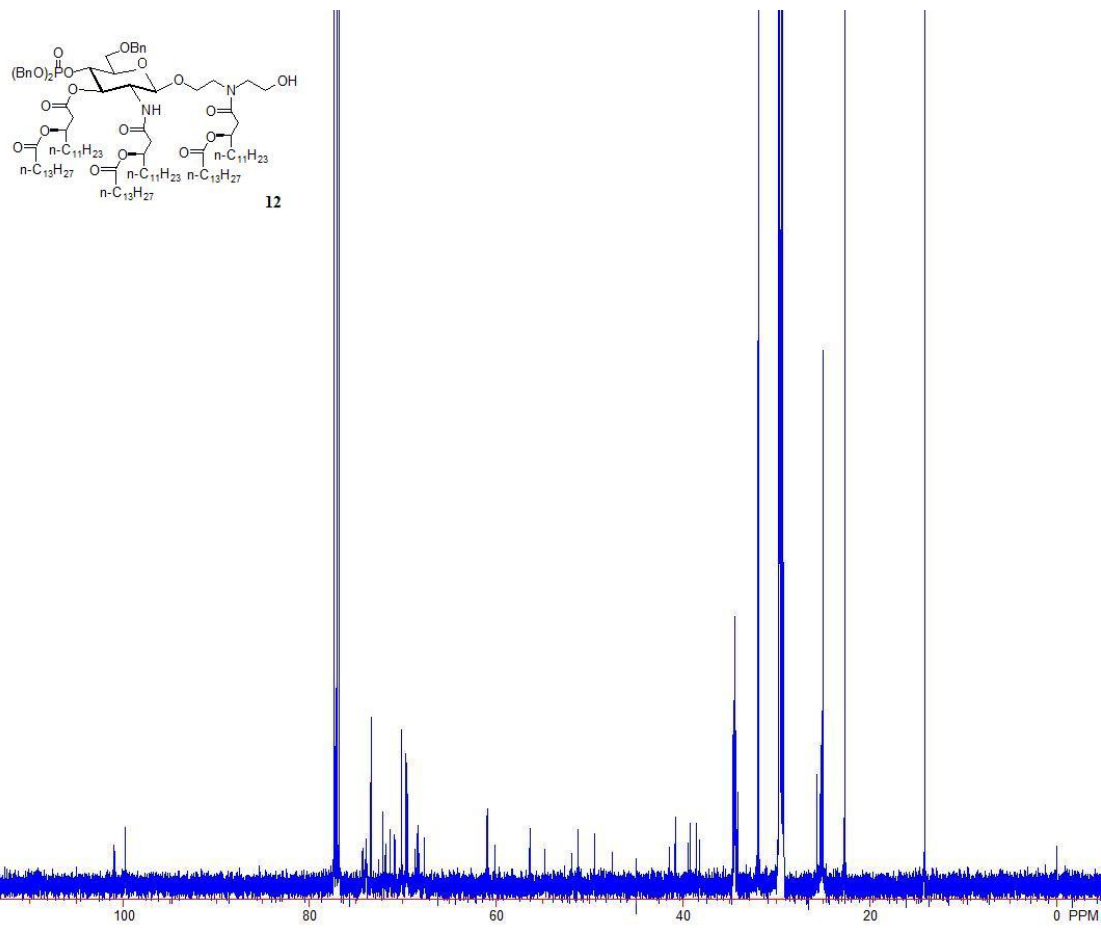

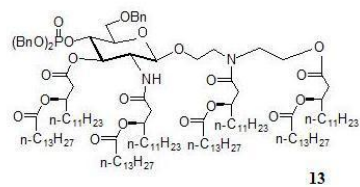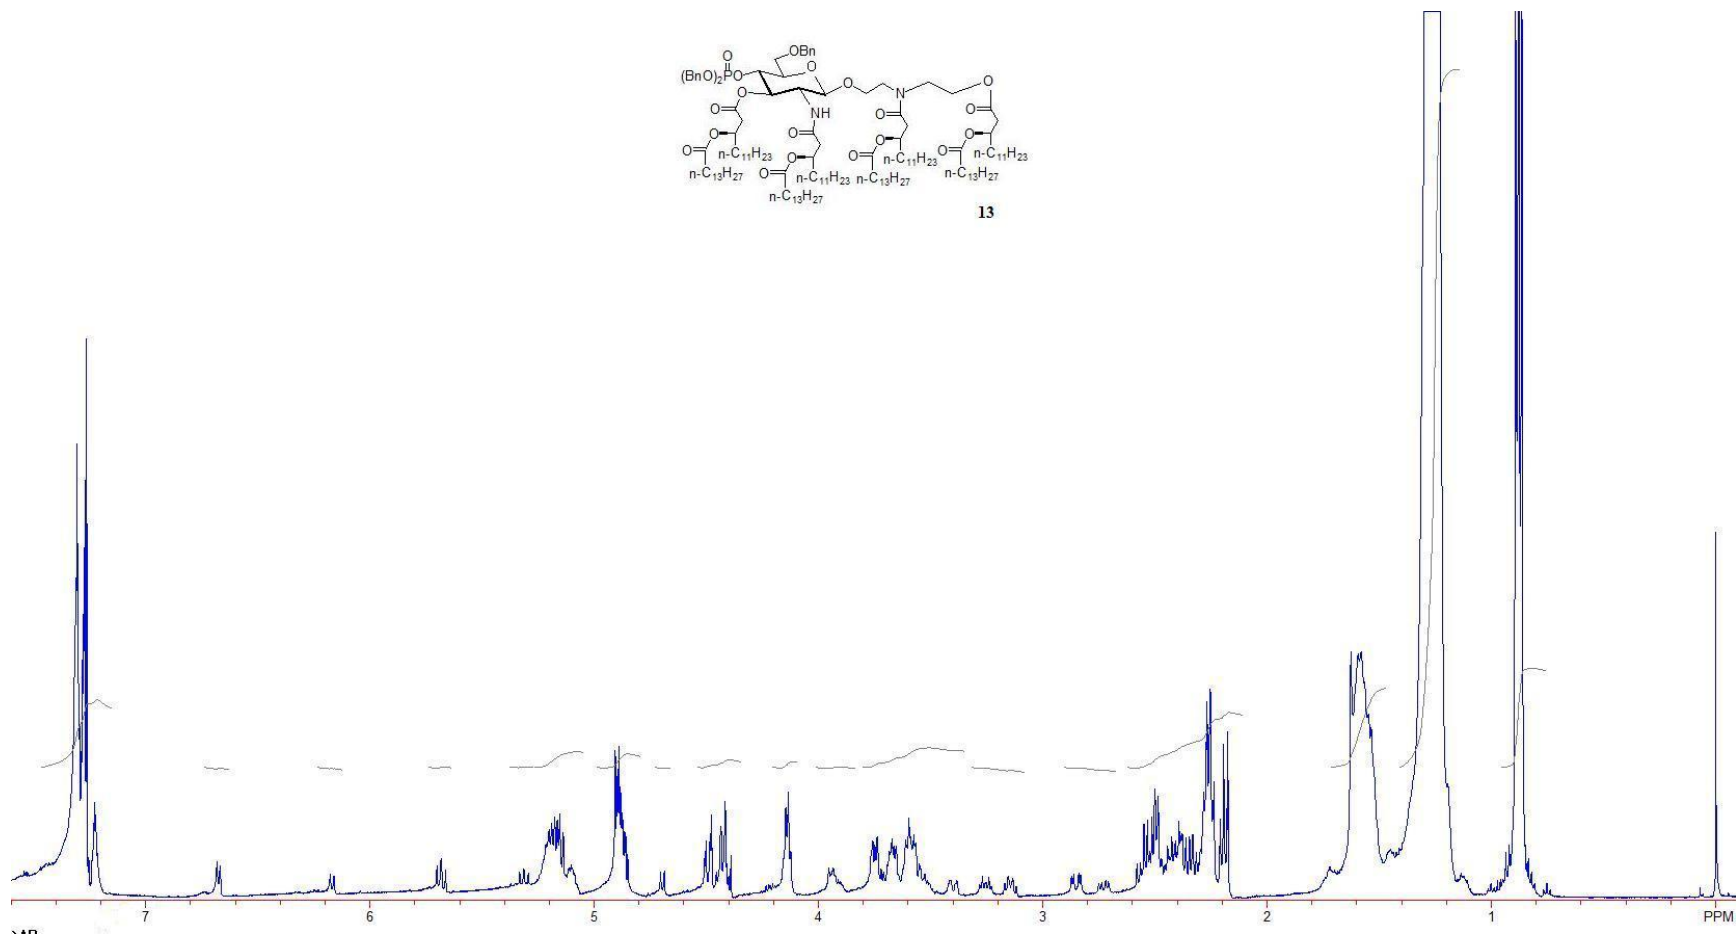

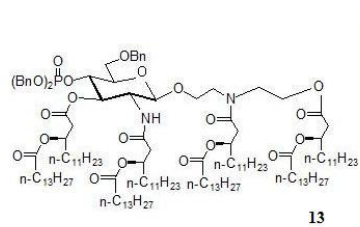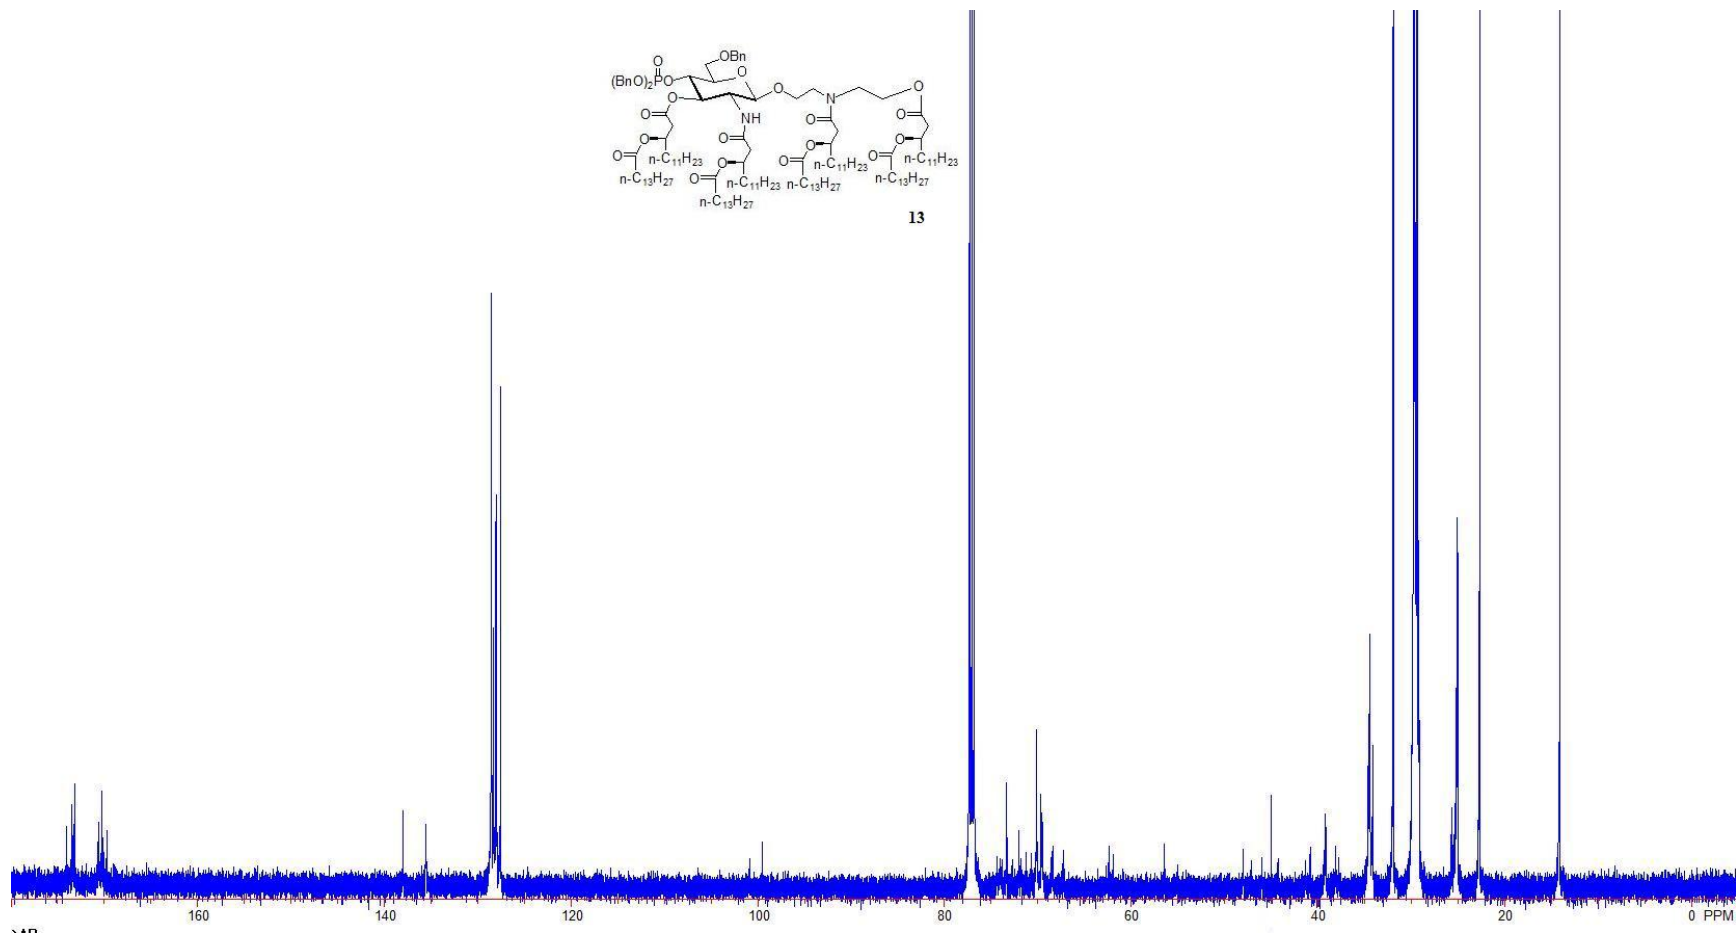

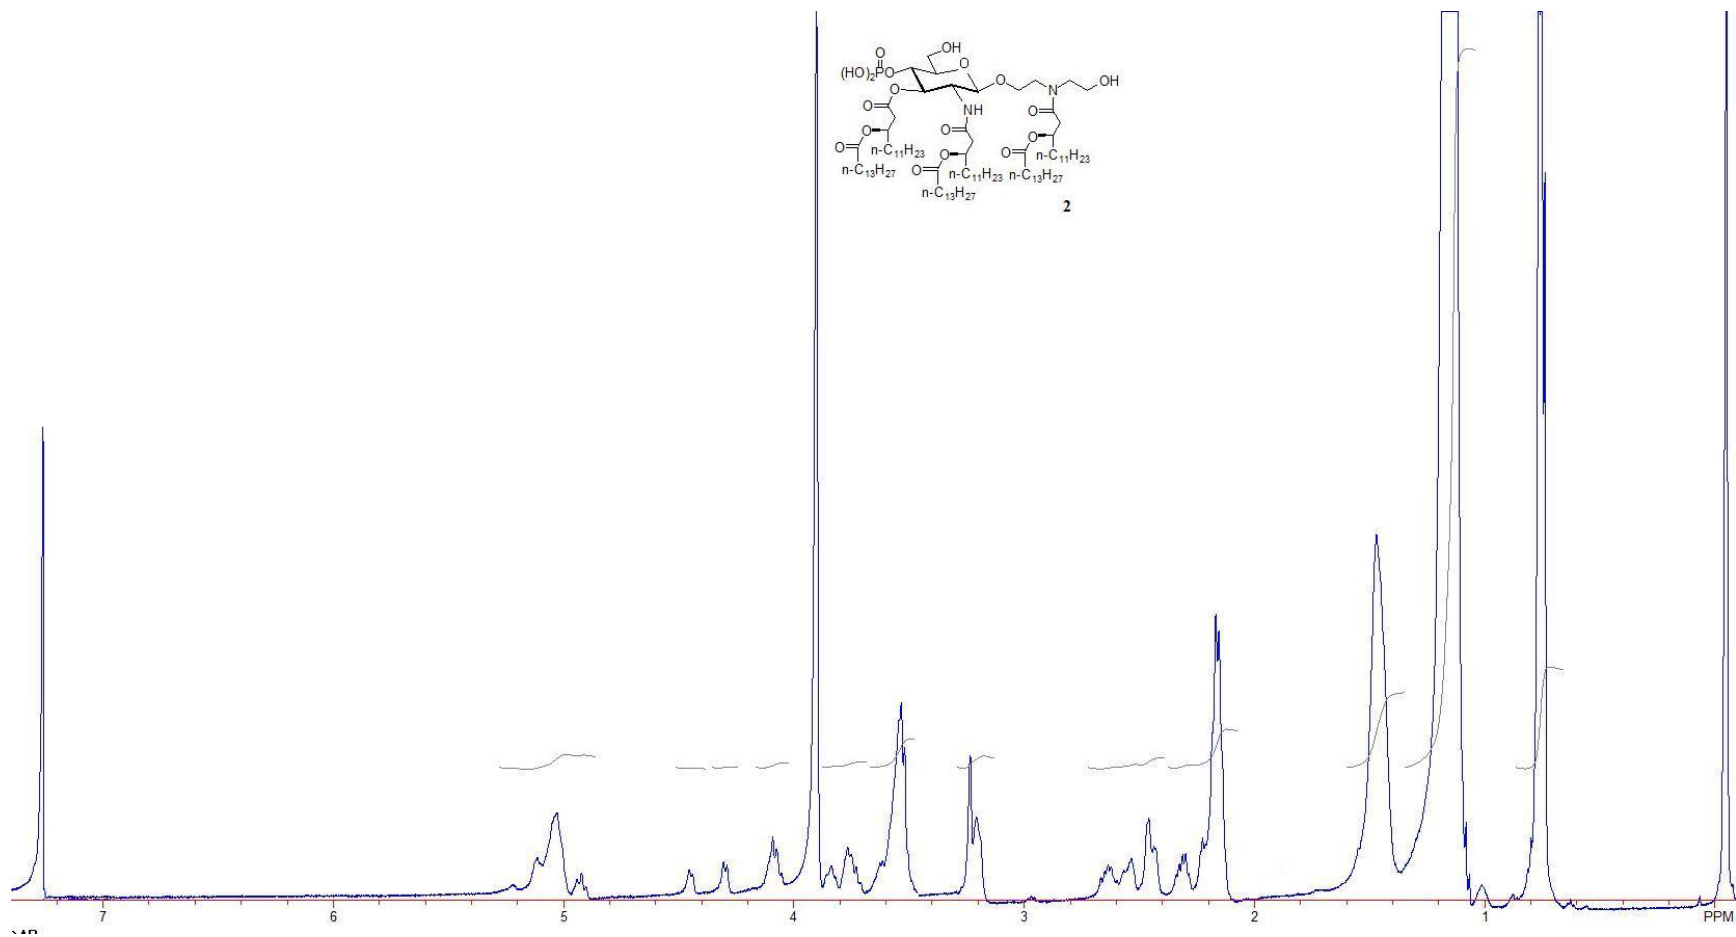

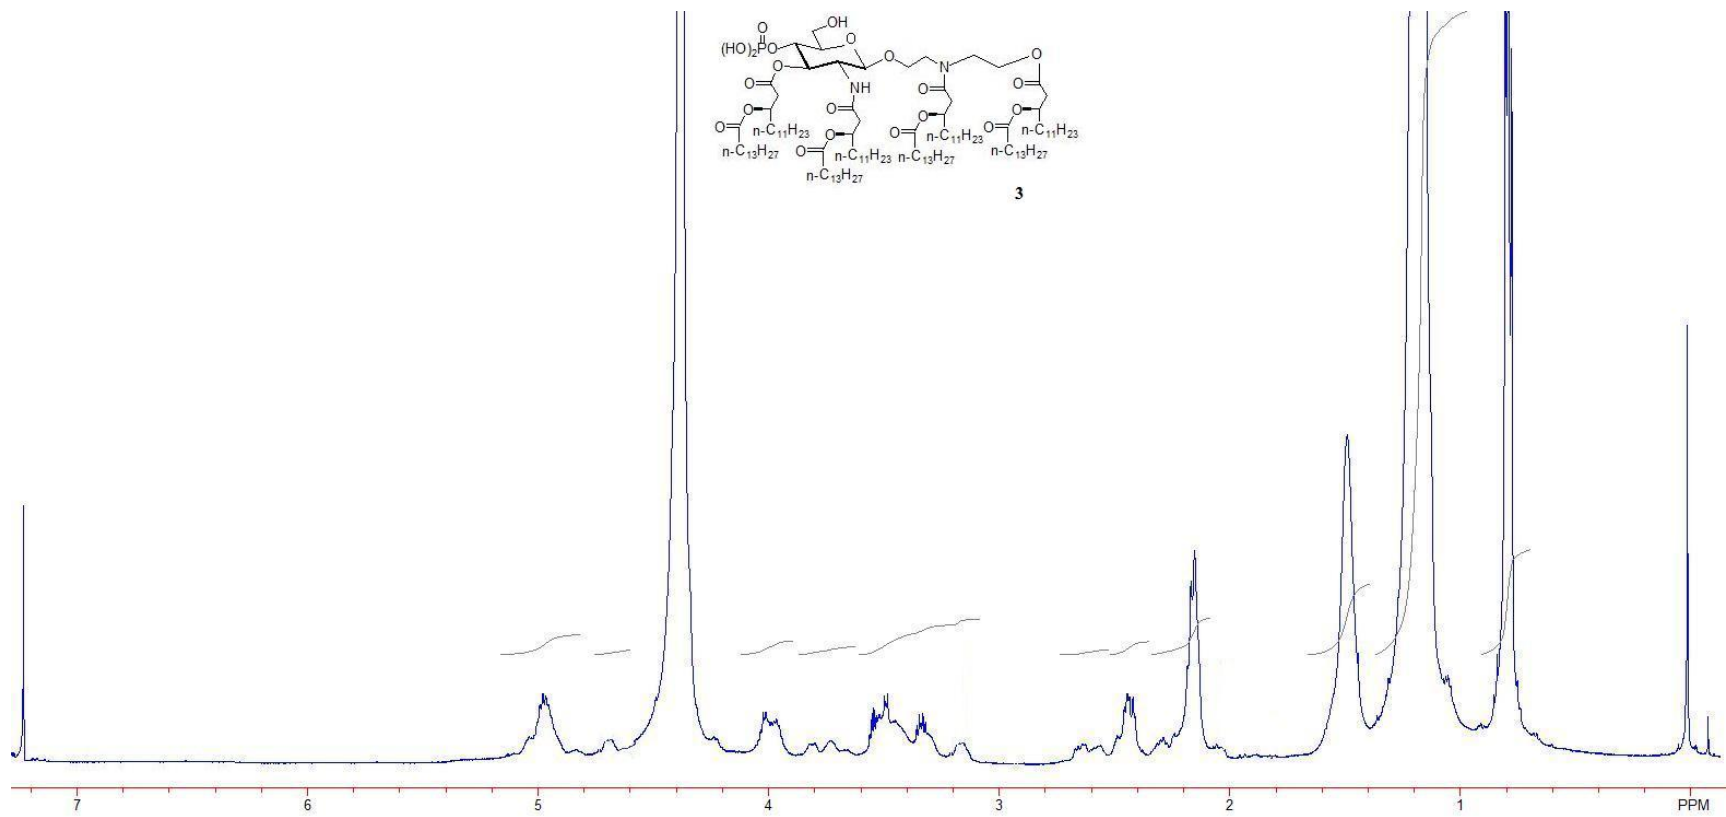

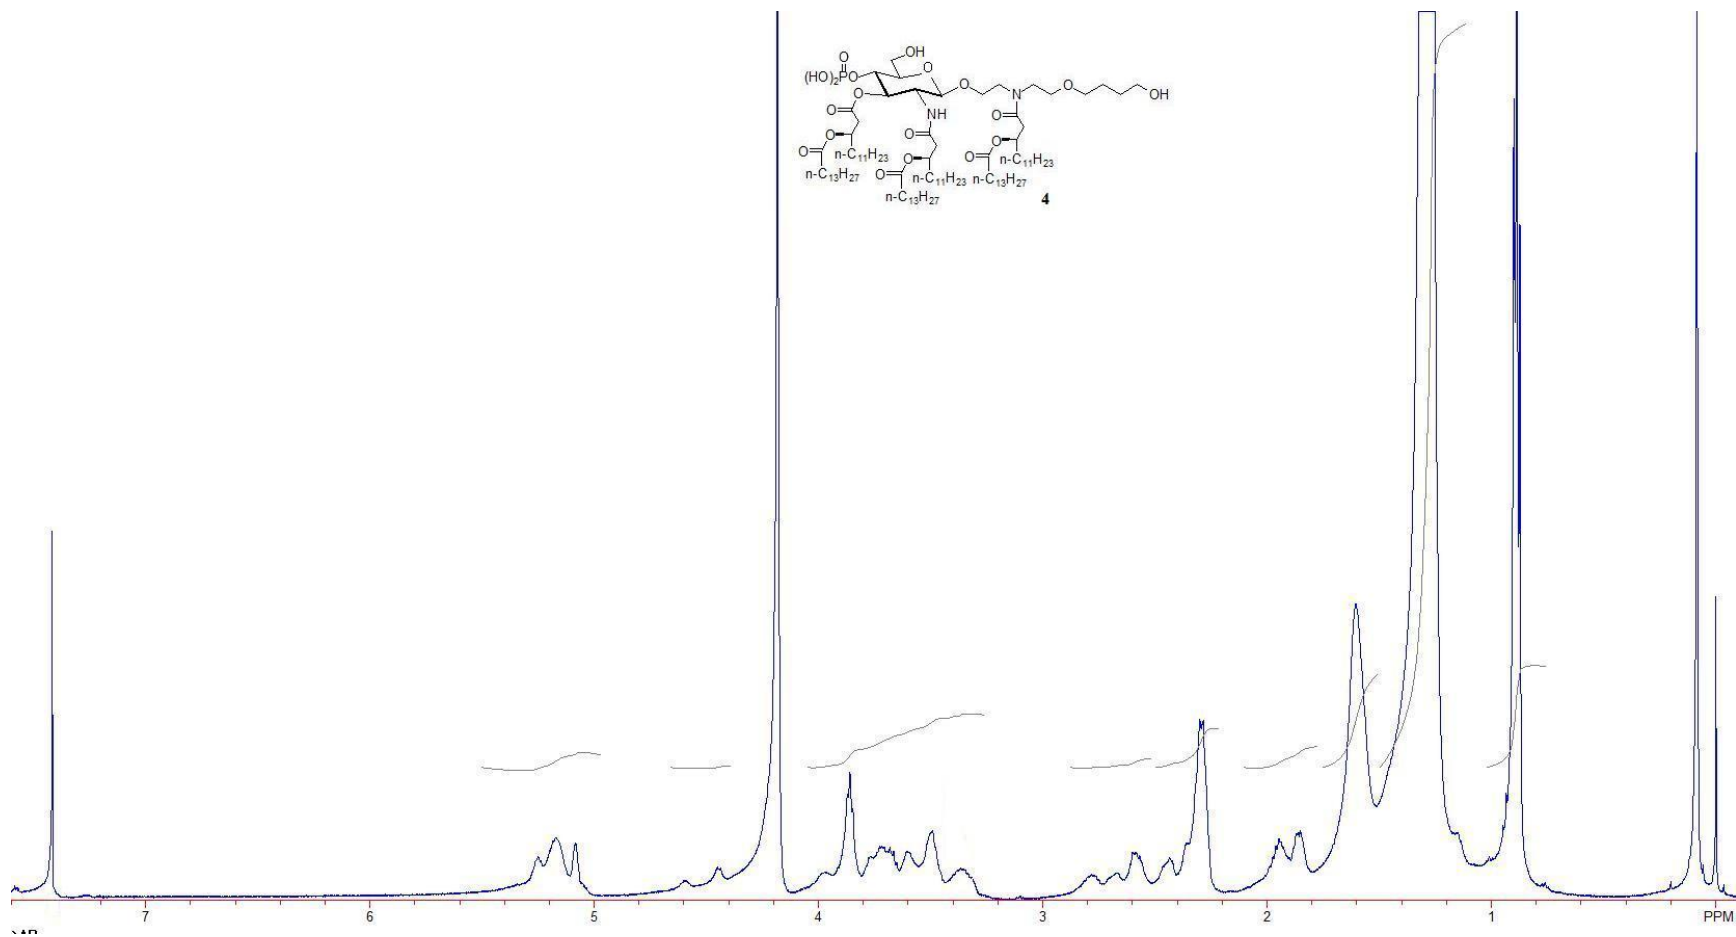

Supplement: c2ra01149b.pdf [file c2ra01149b.pdf]
